# Supplementary material for: Double bond terminated Ln3+-doped LiYF4 nanocrystals with strong single band NIR emission: simple click chemistry route to make water dispersible nanocrystals with various functional groups
Source: Royal Society of Chemistry journal article supplement (doi:10.1039/c5nj02776d), 2016-01-01
Supplement: c5nj02776d1.pdf [file c5nj02776d1.pdf]

### Supplementary Information

#### **Double Bond Terminated Ln<sup>3+</sup> doped LiYF<sub>4</sub> Nanocrystals with Strong Single Band NIR Emission: Simple Click Chemistry Route to Make Water Dispersible Nanocrystals with Various Functional Groups**

Brahmaiah Meesaragandla, Debasrita Sarkar, Venkata N. K. B. Adusumalli and Venkataramanan Mahalingam\*

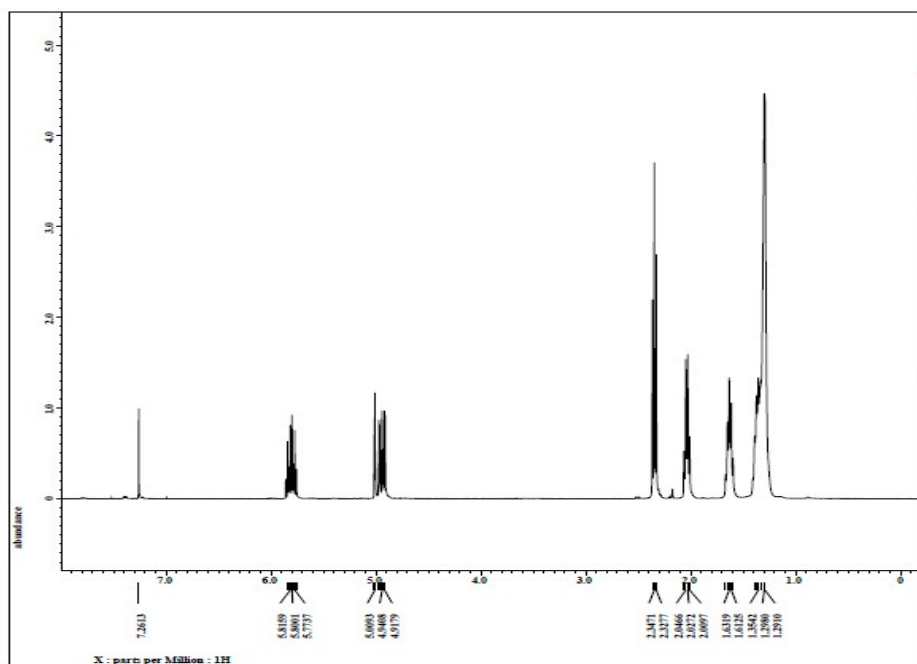

**Figure S1:** <sup>1</sup>H-NMR spectrum of pure UDA in CDCl<sub>3</sub>.

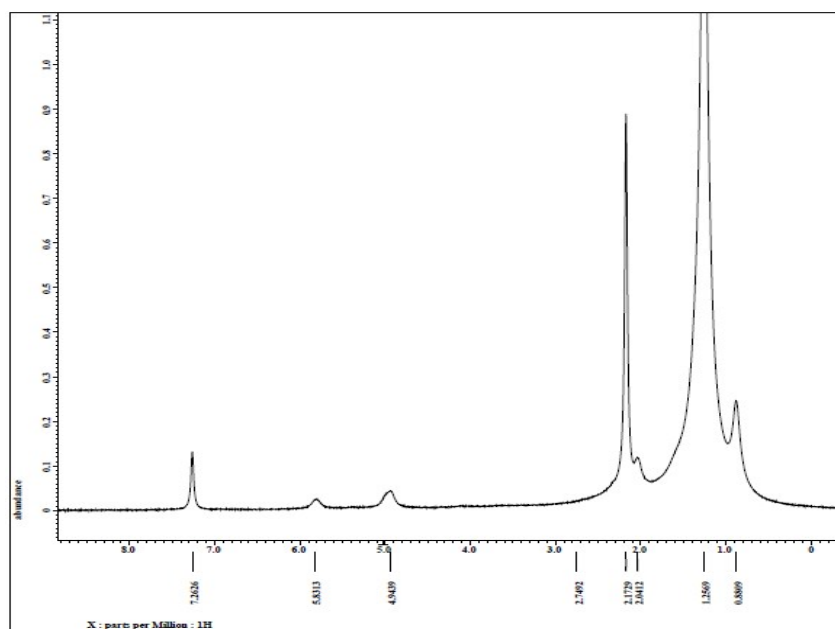

**Figure S2:** <sup>1</sup>H-NMR spectrum of UDA capped Yb<sup>3+</sup>/Tm<sup>3+</sup> doped LiYF<sub>4</sub> nanocrystals in CDCl<sub>3</sub>.

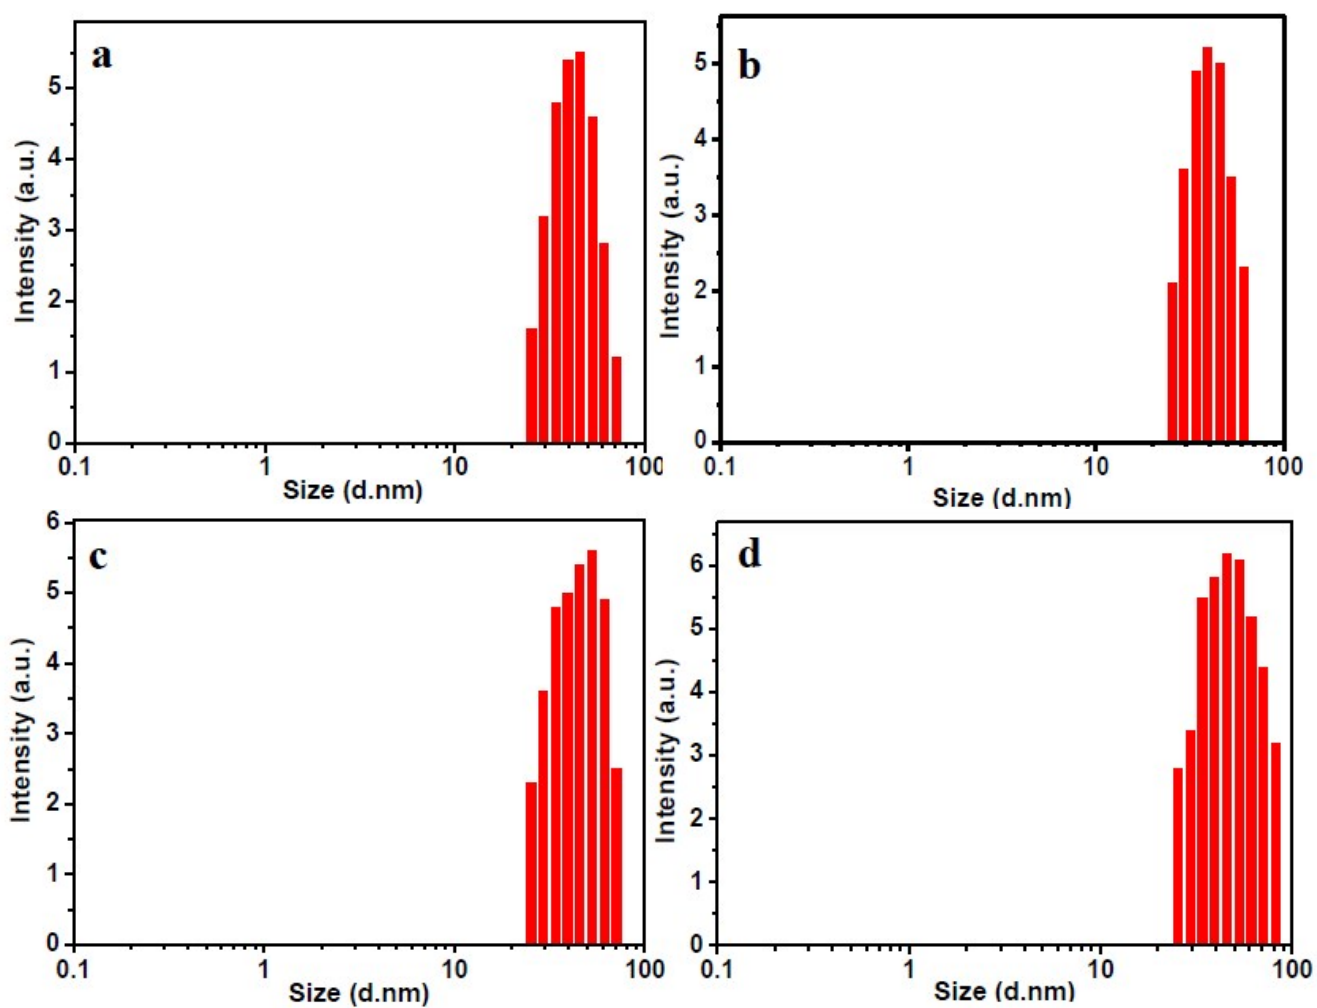

**Figure S3.** DLS analysis of Yb<sup>3+</sup>/Tm<sup>3+</sup>-doped LiYF<sub>4</sub> nanocrystals in water after thiol-ene click reaction with a) cysteine b) cysteamine c) MPA and d) DMP.

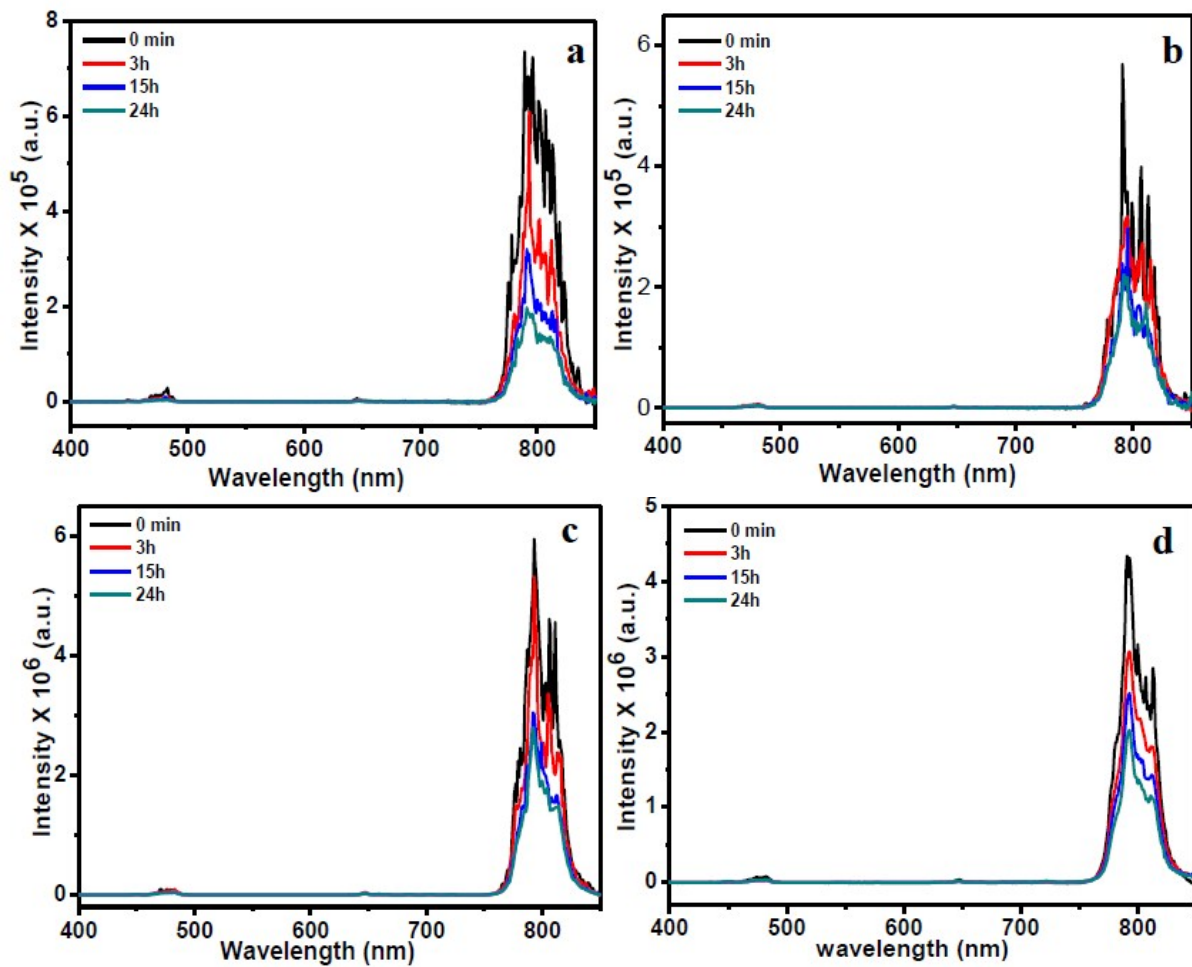

**Figure S4.** Time dependent upconversion emission spectra of Yb<sup>3+</sup>/Tm<sup>3+</sup>-doped LiYF<sub>4</sub> nanocrystals in water after thiol-ene click reaction with a) cysteine b) cysteamine c) MPA and d) DMP.

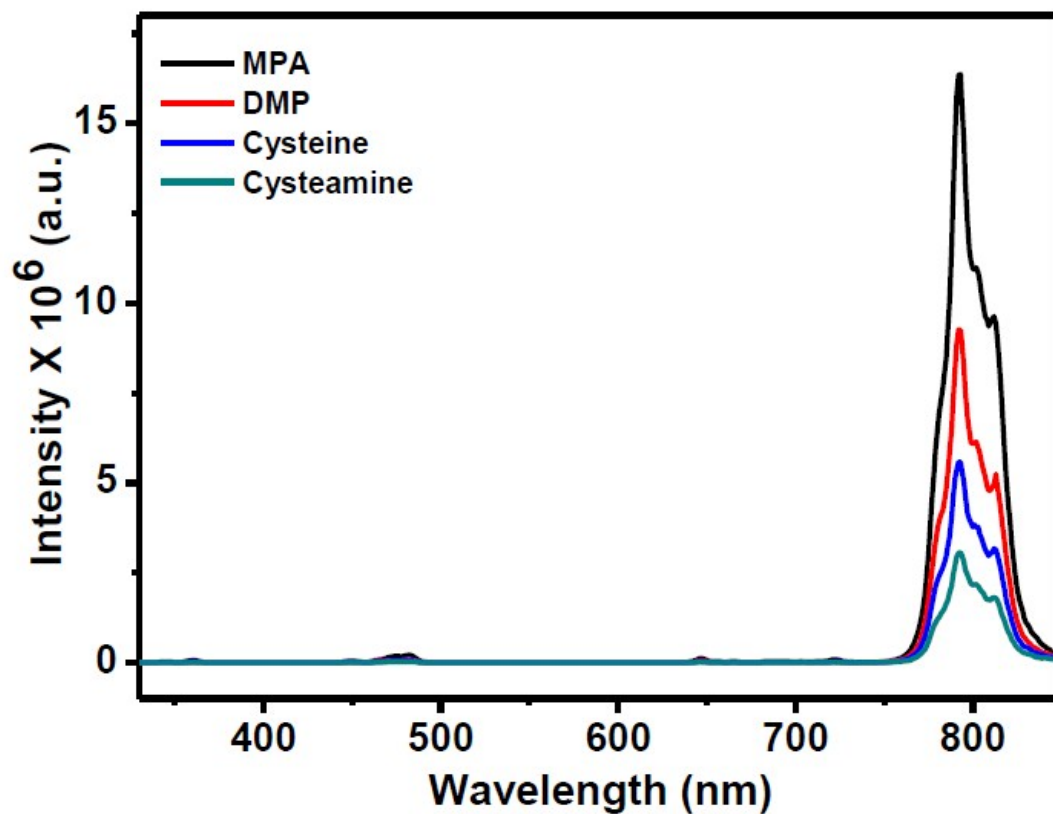

**Figure S5.** Upconversion emission spectra of UDA capped  $\text{Yb}^{3+}/\text{Tm}^{3+}$  doped  $\text{LiYF}_4$  nanocrystals in  $\text{D}_2\text{O}$  (0.5 wt%) after thiol-ene modification with cysteine, cysteamine, MPA and DMP.

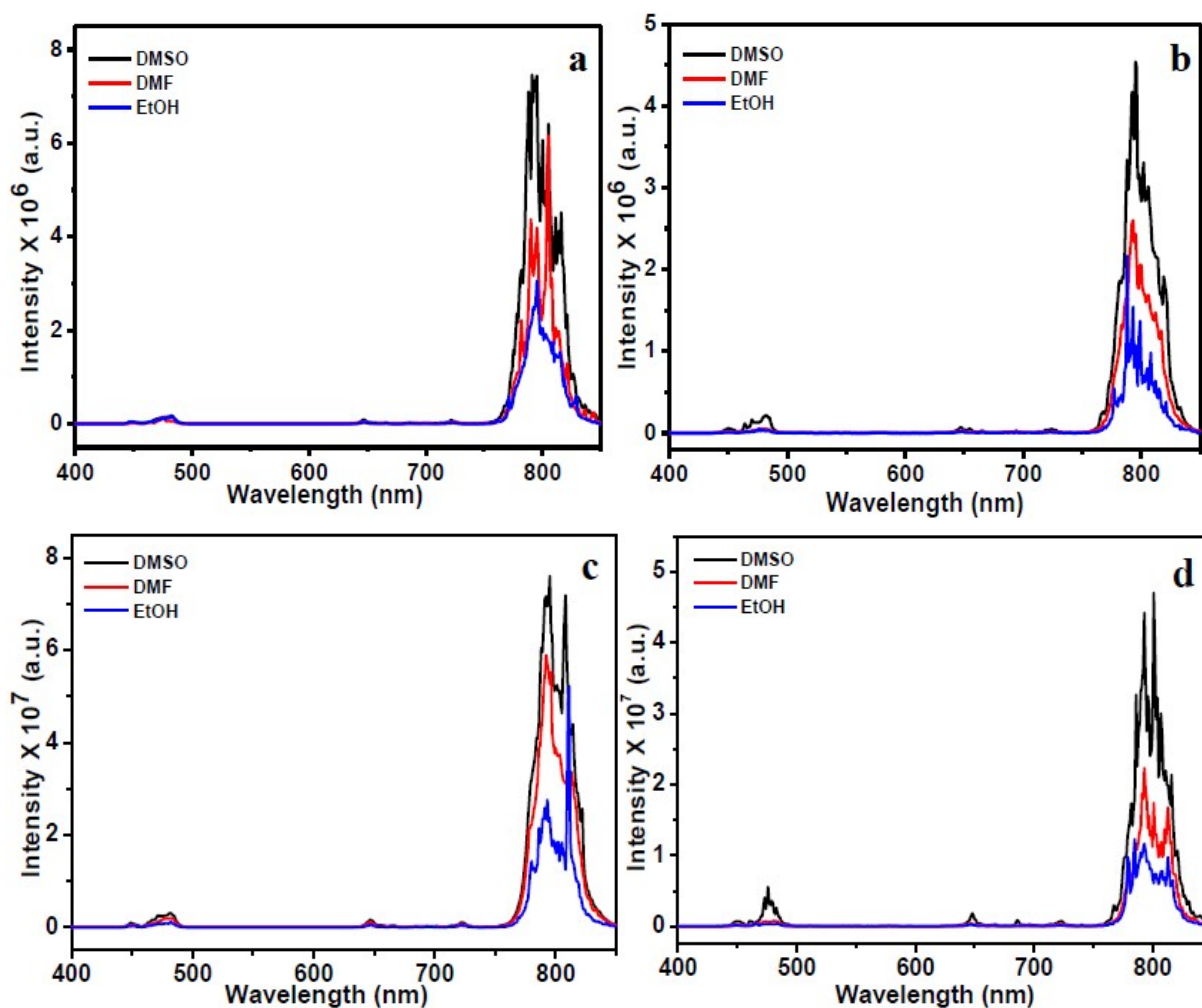

**Figure S6.** Upconversion emission spectra of Yb<sup>3+</sup>/Tm<sup>3+</sup>-doped LiYF<sub>4</sub> nanocrystals in different solvents after thiol-ene click reaction with a) cysteine b) cysteamine c) MPA d) DMP.

**Table S1:** Blue (480 nm) to NIR (800 nm) emission ratio for the cysteine, cysteamine, MPA and DMP functionalized nanocrystals four different samples in different solvents.

|                | <b>Cysteine</b> | <b>Cysteamine</b> | <b>MPA</b> | <b>DMP</b> |
|----------------|-----------------|-------------------|------------|------------|
| <b>Water</b>   | 0.014           | 0.0083            | 0.010      | 0.011      |
| <b>Ethanol</b> | 0.038           | 0.019             | 0.024      | 0.023      |
| <b>DMF</b>     | 0.015           | 0.013             | 0.023      | 0.029      |
| <b>DMSO</b>    | 0.015           | 0.032             | 0.027      | 0.053      |
